# Supplementary material for: RExPrimer: an integrated primer designing tool increases PCR effectiveness by avoiding 3' SNP-in-primer and mis-priming from structural variation
Source: PubMed Central journal article supplement (PMC2788391; doi:10.1186/1471-2164-10-s3-s4), 2009-12-03
Supplement: 1471-2164-10-S3-S4-S1.pdf [file 1471-2164-10-S3-S4-S1.pdf]

| Feature            |                                                           | RExPrimer                                                                                                                                       | PrimerZ                                                | MutScreener                                | EasyExonPrimer                | VariantSEQr                                 | ELXR                                                                        | SNPbox                            | ExonPrimer         | Genomic Primer            |
|--------------------|-----------------------------------------------------------|-------------------------------------------------------------------------------------------------------------------------------------------------|--------------------------------------------------------|--------------------------------------------|-------------------------------|---------------------------------------------|-----------------------------------------------------------------------------|-----------------------------------|--------------------|---------------------------|
| Primer Specificity | avoiding non-target homologous sequences e.g. pseudogenes | <i>Avoiding by using information from Pseudogene database</i>                                                                                   | N/A                                                    | N/A                                        | N/A                           | N/A                                         | Masking using RepeatMasker                                                  | Masking using RepeatMasker        | Masking using BLAT | N/A                       |
|                    | SNPs/Indels allocated in primers                          | <i>Warning/notifying destabilizing effect for redesign decision</i>                                                                             | N/A                                                    | N/A                                        | Avoid                         | Avoid                                       | N/A                                                                         | N/A                               | Avoid              | N/A                       |
|                    | CNV/Indels allocated in primers                           | <i>Warning</i>                                                                                                                                  | N/A                                                    | N/A                                        | N/A                           | N/A                                         | N/A                                                                         | N/A                               | N/A                | N/A                       |
|                    | Specificity checking                                      | In-Silico PCR                                                                                                                                   | In-Silico PCR, NCBI BLAST                              | N/A                                        | In-Silico PCR                 | Experimental testing listed in NCBI ProbeDB | N/A                                                                         | N/A                               | N/A                | N/A                       |
| Appearance         | Input format                                              | gene name, gene ID, genomic location                                                                                                            | gene name, Ensembl ID                                  | GenBank accession, gene ID, input sequence | RefSeq ID, gene name, keyword | gene ID, genomic location, keyword          | RefSeq ID, input sequence                                                   | GenBank accession, input sequence | input sequence     | input sequence, gene name |
|                    | Visualization for user guidance                           | <i>Graphical view of gene structure, genome annotation (SNP, CNV, pseudogene, active gene-pseudogene alignment, etc.) and resulting primers</i> | Graphical view of gene structure and genome annotation | N/A                                        | N/A                           | N/A                                         | Graphical view of predicted gene structure obtained from sequence alignment | N/A                               | N/A                | N/A                       |

| <b>Feature</b> |                      | <b>RExPrimer</b>            | <b>PrimerZ</b> | <b>MutScreener</b>             | <b>EasyExonPrimer</b> | <b>VariantSEQr</b>             | <b>ELXR</b>                    | <b>SNPbox</b>                  | <b>ExonPrimer</b> | <b>Genomic Primer</b> |
|----------------|----------------------|-----------------------------|----------------|--------------------------------|-----------------------|--------------------------------|--------------------------------|--------------------------------|-------------------|-----------------------|
|                | <b>Output format</b> | SVG graphic viewer and HTML | Text format    | Text format and tabular format | Text format           | Text format and graphic viewer | Text format and graphic viewer | Text format and graphic viewer | Text format       | Text format           |
